# Supplementary material for: Ni-doped Al2O3 sensor for effective SO3 gas adsorption and sensing
Source: Royal Society of Chemistry journal article supplement (doi:10.1039/d3nj02783j), 2023-01-01
Supplement: d3nj02783j1.pdf [file d3nj02783j1.pdf]

## Ni-doped Al<sub>2</sub>O<sub>3</sub> sensor for effective SO<sub>3</sub> gas adsorption and sensing

V. Manikandan<sup>a\*</sup>, G. Ayyannan<sup>b</sup>, Iulian Petrila<sup>c</sup>, Rajaram S. Mane<sup>d</sup>, Kamil Sobczak<sup>f</sup>, J. Chandrasekaran<sup>a</sup>, Robert D. Crapnell<sup>e</sup> and Craig E. Banks<sup>e</sup>

<sup>a</sup>Department of Physics, Sri Ramakrishna Mission Vidyalaya College of Arts and Science, Coimbatore 641 020, India.

<sup>b</sup>Department of Chemistry, Sri Ramakrishna Mission Vidyalaya College of Arts and Science, Coimbatore 641 020, India.

<sup>c</sup>Faculty of Automatic Control and Computer Engineering, Gheorghe Asachi Technical University of Iasi, Blvd. Dimitrie Mangeron, no. 67, 700050 Iasi, Romania

<sup>d</sup>Center for Nanomaterial & Energy Devices, Swami Ramanand Teerth Marathwada University, Dnyanteerth, Vishnupuri, Nanded, 431606, India

<sup>e</sup>Faculty of science and engineering, Manchester metropolitan University, chester street, manchester, M1 5GD

<sup>f</sup>Biological and Chemical Research Centre, Faculty of Chemistry, University of Warsaw, Zwirki i Wigury 101, 02-089 Warsaw, Poland.

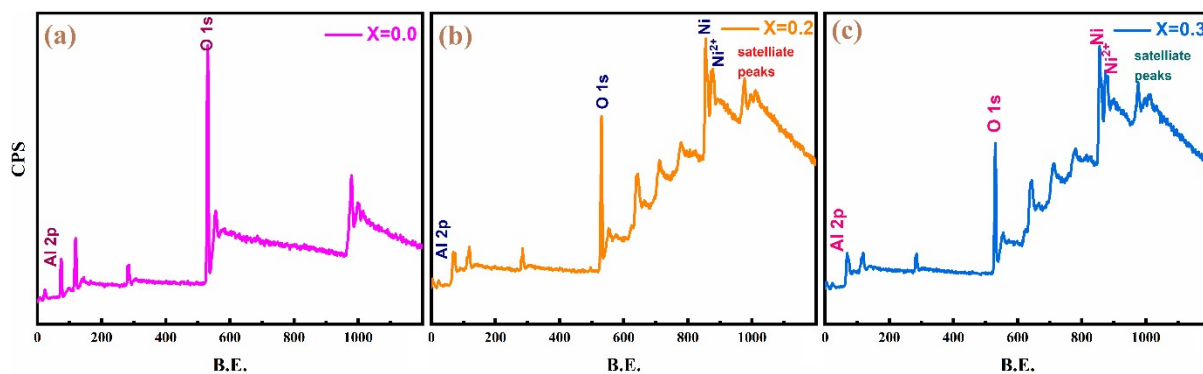

**Fig. S1** XPS survey scan of undoped and doped aluminum oxide nanoparticles.
